# Supplementary material
Source: publisher figshare collection journal article supplement (https://tandf.figshare.com/articles/dataset/_/5379283)
Supplement: Supplementary file 1 [file 1]

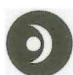

## Skills, styles and situations questionnaire

In this activity you will think about the everyday communication skills listed below. Mark a cross (X) on the line to indicate how satisfied you feel about your skills in that area.

| Skill                                           | Satisfaction Rating        |
|-------------------------------------------------|----------------------------|
| Listening to what other people say to me        | Dissatisfied-----Satisfied |
| Asking questions to keep the conversation going | Dissatisfied-----Satisfied |
| Having something to say in conversation         | Dissatisfied-----Satisfied |
| Allowing opportunities for other people to talk | Dissatisfied-----Satisfied |
| Allowing for natural pauses in conversation     | Dissatisfied-----Satisfied |
| Smiling and looking friendly when I meet people | Dissatisfied-----Satisfied |
| Kicking off a conversation with others          | Dissatisfied-----Satisfied |
| Ending a conversation with a positive comment   | Dissatisfied-----Satisfied |
| Having good manners in social situations        | Dissatisfied-----Satisfied |
| Sorting out misunderstandings                   | Dissatisfied-----Satisfied |
| Creating a social routine for myself            | Dissatisfied-----Satisfied |
| Having interests and hobbies to share           | Dissatisfied-----Satisfied |
| Starting small talk to build new relationships  | Dissatisfied-----Satisfied |
| Other:                                          | Dissatisfied-----Satisfied |
| Other:                                          | Dissatisfied-----Satisfied |
